# Supplementary material for: LRRK2 phosphorylates novel tau epitopes and promotes tauopathy
Source: Springer Nature journal article supplement (doi:10.1007/s00401-013-1188-4), 2013-10-11
Supplement: MOESM1 [file 8404344]

## **LRRK2 Phosphorylates Novel Tau Epitopes and Promotes Tauopathy**

Rachel M. Bailey<sup>1,2</sup>, Jason P. Covy<sup>3,4</sup>, Heather L. Melrose<sup>2</sup>, Linda Rousseau<sup>2</sup>, Ruth Watkinson<sup>2</sup>,  
Joshua Knight<sup>1,2</sup>, Sarah Miles<sup>2</sup>, Matthew J. Farrer<sup>2,5</sup>, Dennis W. Dickson<sup>2</sup>, Benoit I. Giasson<sup>1,3\*</sup>,  
and Jada Lewis<sup>1,2\*</sup>

<sup>1</sup> Center for Translational Research in Neurodegenerative Disease and Department of Neuroscience, University of Florida, Gainesville, FL 32610, USA., <sup>2</sup> Department of Neuroscience, Mayo Clinic, Jacksonville, FL 32224, USA., <sup>3</sup> Department of Pharmacology, University of Pennsylvania School of Medicine, Philadelphia, PA 19104, USA., <sup>4</sup> Department of Molecular & Cellular Physiology, Stanford University, Stanford, CA, 94305, <sup>5</sup> Department of Medical Genetics, University of British Columbia, Vancouver, British Columbia V6T 2B5, Canada.

**Abbreviated title:** LRRK2 phosphorylates tau

**\*Address correspondence to:**

Dr. Jada Lewis, Department of Neuroscience, Center for Translational Research in Neurodegenerative Disease, University of Florida, 1275 Center Drive, BMS Building J-487, PO Box 100159, Gainesville, FL32610-0244. Tel: 352-273-9666; E-mail: [jada.lewis@ufl.edu](mailto:jada.lewis@ufl.edu).

Dr. Benoit Giasson, Department of Neuroscience, Center for Translational Research in Neurodegenerative Disease, University of Florida, 1275 Center Drive, BMS Building J-497, PO Box 100159, Gainesville, FL32610-0244. Tel: 352-273-9363; E-mail: [bgiasson@ufl.edu](mailto:bgiasson@ufl.edu).

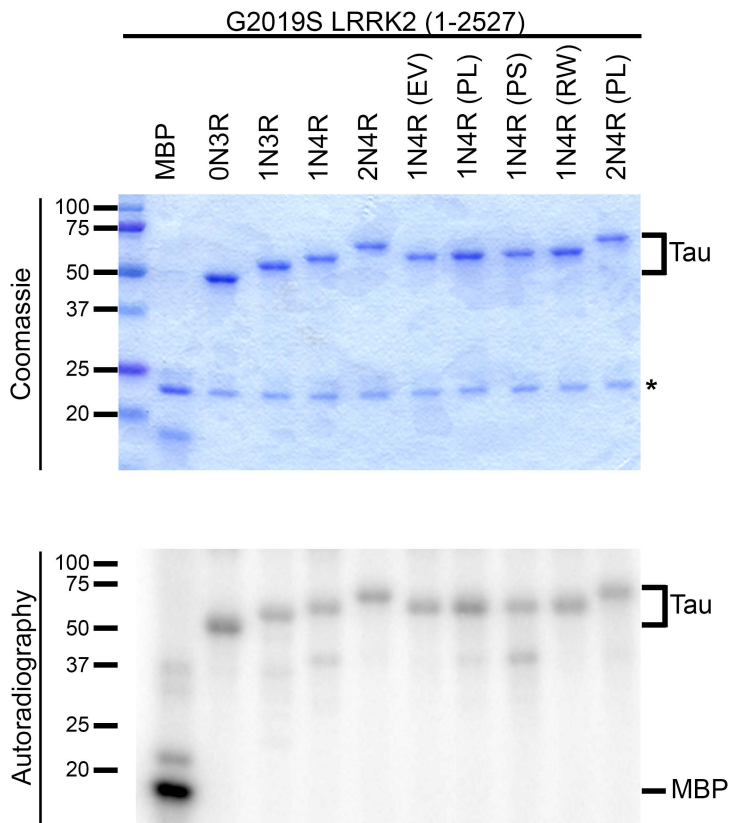

**Bailey et al Supplemental Fig. 1**

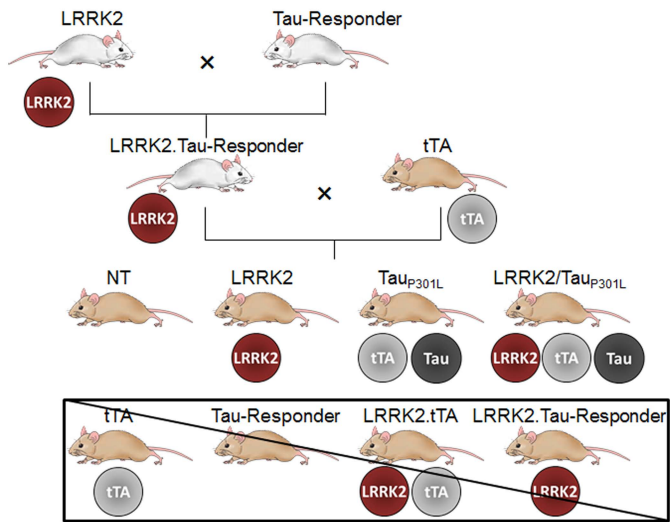

**Bailey et al Supplemental Fig. 2**

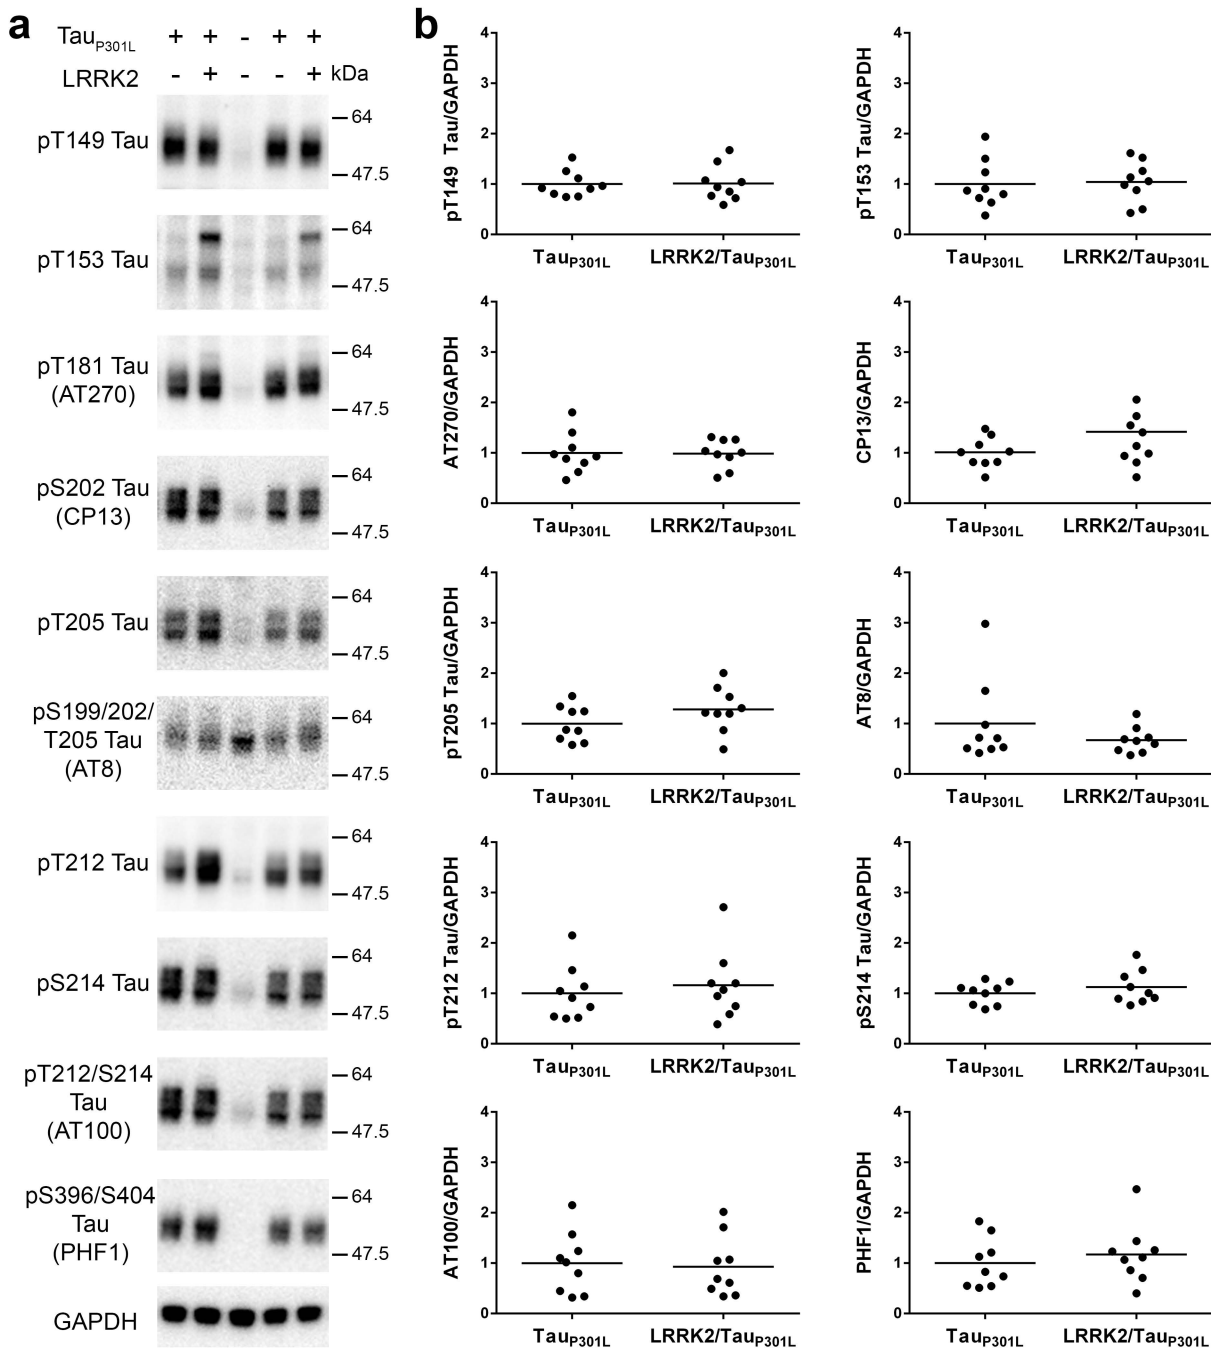

**Bailey et al Supplemental Fig. 3**

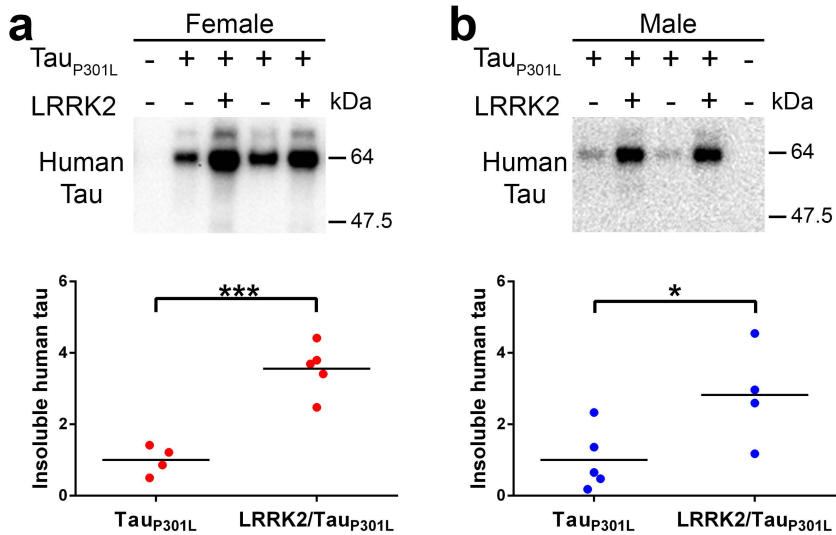

**Bailey et al Supplemental Fig. 4**

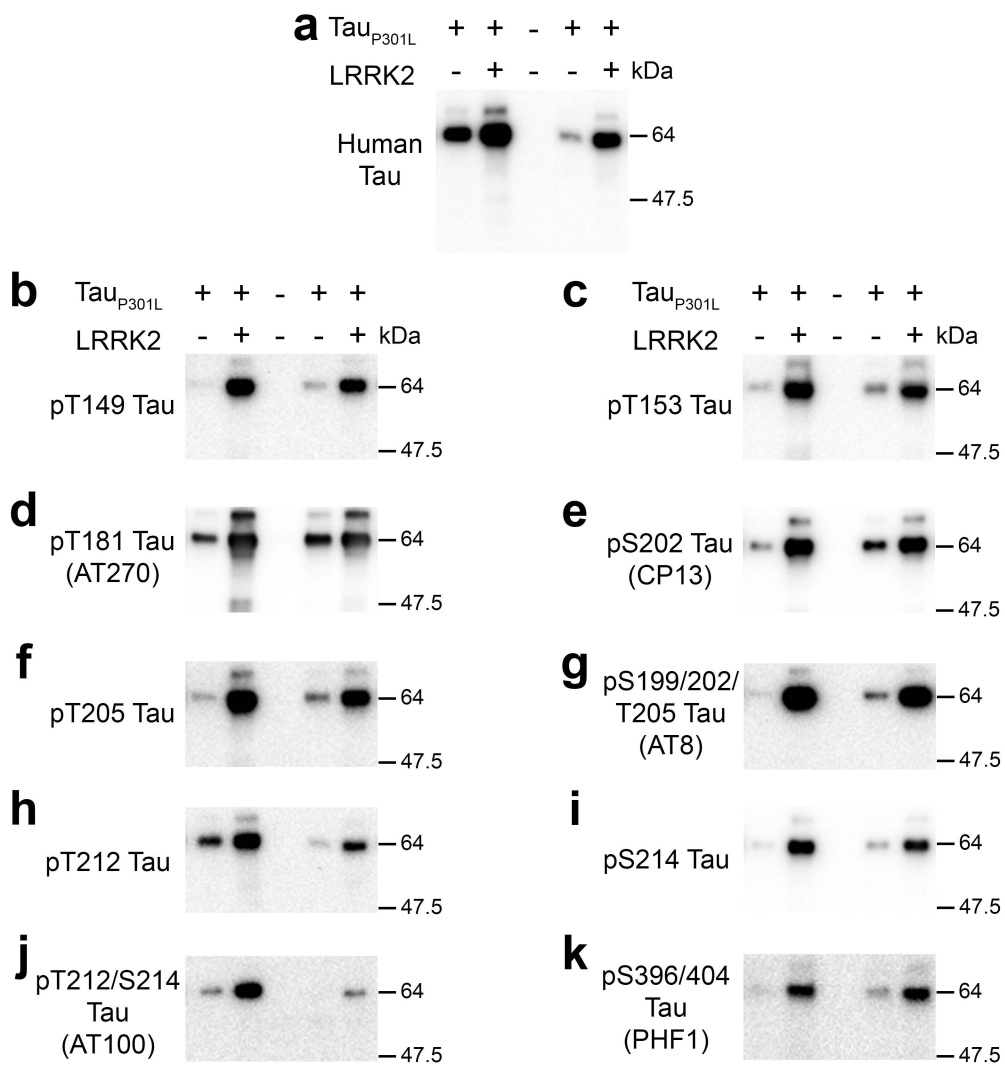

**Bailey et al Supplemental Fig. 5**



**Supplemental Table 1A.** Tau residues phosphorylated *in vitro* by LRRK2

| <b>Residue</b> | <b>% Phosphorylation</b> |
|----------------|--------------------------|
| T30            | 5.3                      |
| T135           | 0.5                      |
| <b>T149</b>    | <b>16.8</b>              |
| <b>T153</b>    | <b>13.2</b>              |
| <b>T169</b>    | <b>47.1</b>              |
| T175           | 8.7                      |
| T181           | 6.1                      |
| <b>T205</b>    | <b>23.3</b>              |
| S210           | 9.1                      |
| T212           | 3.8                      |
| T217           | 11.1                     |
| <b>T231</b>    | <b>12.8</b>              |
| S237           | 2.3                      |
| T245           | 9.4                      |
| S258           | 3.4                      |
| <b>T263</b>    | <b>15.8</b>              |
| S324           | 8.0                      |
| S356           | 2.2                      |
| T361           | 2.9                      |
| T373           | 1.5                      |
| T377           | 11.1                     |
| T386           | 3.7                      |
| Y394           | 3.6                      |
| T403           | 5.0                      |
| S435           | 2.0                      |



| <b>Supplemental Table 1B.</b> Tau residues potentially phosphorylated <i>in vitro</i> by LRRK2 |  |
|------------------------------------------------------------------------------------------------|--|
| <b>Residue</b>                                                                                 |  |
| T30                                                                                            |  |
| T17                                                                                            |  |
| S184                                                                                           |  |
| S185                                                                                           |  |
| S208                                                                                           |  |
| T220                                                                                           |  |
| S238                                                                                           |  |
| S262                                                                                           |  |
| S352                                                                                           |  |
| S413                                                                                           |  |

| <b>Supplemental Table 2.</b> Synthetic tau peptide list |                            |
|---------------------------------------------------------|----------------------------|
| <b>Peptide</b>                                          | <b>Amino Acid Coverage</b> |
| Tau-A                                                   | KKAKGADGKTKIATPRGAAPPGQK   |
| Tau-B                                                   | REPKKVAVVRTPPKSPSSAKSRL    |
| Tau-C                                                   | QKGQANATRIPAKTPPAPKTPPSSG  |
| Tau-D                                                   | SGYSSPGSPGTPGSRSRTPSLPT    |
| Tau-E                                                   | SSAKSRLQTAPVPMPDLK         |
| Tau-F                                                   | DLKNVKSKIGSTENLKHQ         |
| Tau-G                                                   | GQVEVKSEKLDK               |
| Tau-H                                                   | FKDRVQSKIGSLDN             |
| Tau-I                                                   | DRVQSKIGSLDNITHVPGGGNKKIE  |
| Tau-J                                                   | QSKIGSLDNITHVPGGG          |

**Supplemental Table 2** Synthetic tau peptide sequences. Red = residues that were identified by mass spectrometry as LRRK2 phosphorylation targets.
